# Supplementary material for: Structures of manganese polysulfides: mass-selected photodissociation and density functional calculations
Source: Royal Society of Chemistry journal article supplement (doi:10.1039/c0dt01179g), 2011-01-01
Supplement: c0dt01179g.pdf [file c0dt01179g.pdf]

# *Supplementary Information*

## **Structures of Manganese Polysulfides: Mass-selected Photodissociation and Density Functional Calculations**

Yu-Chao Zhao, Jinyun Yuan, Zeng-Guang Zhang, Hong-Guang Xu, and Weijun Zheng\*

*Beijing National Laboratory for Molecular Sciences, State Key Laboratory of  
Molecular Reaction Dynamics, Institute of Chemistry, Chinese Academy of sciences,  
Beijing 100190, China*

\* Corresponding author. E-mail: zhengwj@iccas.ac.cn

Tel: +86 10 62635054

Fax: +86 10 62563167

### MnS<sup>+</sup>

1A:

|    |          |          |           |
|----|----------|----------|-----------|
| Mn | 0.000000 | 0.000000 | 0.841789  |
| S  | 0.000000 | 0.000000 | -1.315296 |

1B:

|    |          |          |           |
|----|----------|----------|-----------|
| Mn | 0.000000 | 0.000000 | 0.876229  |
| S  | 0.000000 | 0.000000 | -1.369107 |

### MnS<sub>2</sub><sup>+</sup>

2A:

|    |          |           |           |
|----|----------|-----------|-----------|
| Mn | 0.000000 | 0.000000  | 1.172882  |
| S  | 0.000000 | 1.034096  | -0.916314 |
| S  | 0.000000 | -1.034096 | -0.916314 |

2B:

|    |          |           |           |
|----|----------|-----------|-----------|
| Mn | 0.000000 | 0.000000  | 1.097751  |
| S  | 0.000000 | 1.044649  | -0.857618 |
| S  | 0.000000 | -1.044649 | -0.857618 |

2C:

|    |           |           |          |
|----|-----------|-----------|----------|
| S  | 1.938213  | 0.678059  | 0.000000 |
| S  | 0.000000  | 0.973215  | 0.000000 |
| Mn | -1.240456 | -1.056816 | 0.000000 |

2D:

|    |           |           |          |
|----|-----------|-----------|----------|
| S  | 1.929828  | 0.586585  | 0.000000 |
| S  | 0.000000  | 1.010288  | 0.000000 |
| Mn | -1.235090 | -1.021999 | 0.000000 |

2E:

|    |          |           |           |
|----|----------|-----------|-----------|
| S  | 0.000000 | 0.000000  | 1.133738  |
| S  | 0.000000 | 0.992871  | -0.885733 |
| Mn | 0.000000 | -0.992871 | -0.885733 |

### MnS<sub>3</sub><sup>+</sup>

3A:

|    |          |           |           |
|----|----------|-----------|-----------|
| Mn | 0.000000 | 0.000000  | 1.371545  |
| S  | 0.000000 | 1.667085  | -0.305787 |
| S  | 0.000000 | -1.667085 | -0.305787 |
| S  | 0.000000 | 0.000000  | -1.531465 |

3B:

|    |          |           |           |
|----|----------|-----------|-----------|
| S  | 0.000000 | 0.000000  | 2.598958  |
| Mn | 0.000000 | 0.000000  | 0.447958  |
| S  | 0.000000 | 0.998613  | -1.649446 |
| S  | 0.000000 | -0.998613 | -1.649446 |

3C:

|    |           |           |           |
|----|-----------|-----------|-----------|
| Mn | 1.486245  | -0.726875 | -0.080663 |
| S  | 0.764822  | 1.351732  | -0.215225 |
| S  | -0.771062 | 0.099628  | 0.739372  |
| S  | -2.316018 | -0.315618 | -0.398111 |

### MnS<sub>4</sub><sup>+</sup>

4A:

|    |          |           |           |
|----|----------|-----------|-----------|
| Mn | 0.000000 | 0.000000  | 0.000000  |
| S  | 0.000000 | 1.005134  | 2.092671  |
| S  | 0.000000 | -1.005134 | 2.092671  |
| S  | 0.000000 | 1.005134  | -2.092671 |
| S  | 0.000000 | -1.005134 | -2.092671 |

4B:

|    |          |           |           |
|----|----------|-----------|-----------|
| S  | 0.096412 | 0.078705  | -0.025622 |
| S  | 0.096413 | -0.078705 | 2.102641  |
| S  | 1.962222 | 0.044590  | 2.942124  |
| S  | 1.962221 | -0.044590 | -0.865105 |
| Mn | 3.281737 | 0.000000  | 1.038509  |

4C:

|    |           |           |           |
|----|-----------|-----------|-----------|
| S  | 0.231790  | -0.353729 | 1.867929  |
| S  | 0.231790  | -0.353729 | -1.867929 |
| S  | 0.231790  | 1.536929  | 1.073068  |
| S  | 0.231790  | 1.536929  | -1.073068 |
| Mn | -0.593383 | -1.514496 | 0.000000  |

4D:

|    |           |           |           |
|----|-----------|-----------|-----------|
| Mn | 0.000000  | 0.000000  | 1.052519  |
| S  | 1.513874  | 0.999539  | -0.411140 |
| S  | 1.513874  | -0.999539 | -0.411140 |
| S  | -1.513874 | 0.999539  | -0.411140 |
| S  | -1.513874 | -0.999539 | -0.411140 |

4E:

|    |           |           |           |
|----|-----------|-----------|-----------|
| Mn | -0.454284 | -1.230748 | -0.366767 |
| S  | -0.727060 | 1.134316  | -0.649544 |
| S  | -1.928135 | 0.264472  | 0.790807  |
| S  | 1.900509  | -0.703497 | 0.366510  |
| S  | 1.464505  | 1.227752  | 0.065300  |

4F:

|    |           |           |           |
|----|-----------|-----------|-----------|
| Mn | -0.003677 | -0.258189 | -0.054416 |
| S  | -2.160984 | -0.641803 | -0.567451 |
| S  | -1.788865 | 0.878610  | 0.710522  |
| S  | 2.085406  | -0.596103 | 0.711015  |
| S  | 1.870188  | 0.762717  | -0.769062 |

### MnS<sub>5</sub><sup>+</sup>

5A:

|    |          |           |           |
|----|----------|-----------|-----------|
| S  | 0.000000 | 1.595474  | -1.366438 |
| S  | 0.000000 | 0.995633  | 2.435068  |
| S  | 0.000000 | -1.595474 | -1.366438 |
| S  | 0.000000 | -0.995633 | 2.435068  |
| Mn | 0.000000 | 0.000000  | 0.338937  |
| S  | 0.000000 | 0.000000  | -2.666850 |

5B:

|    |          |           |           |
|----|----------|-----------|-----------|
| Mn | 0.000000 | 0.000000  | 0.321001  |
| S  | 0.000000 | 0.000000  | -2.645924 |
| S  | 0.000000 | 0.995802  | 2.436518  |
| S  | 0.000000 | -0.995802 | 2.436518  |
| S  | 0.000000 | -1.620917 | -1.364337 |
| S  | 0.000000 | 1.620917  | -1.364337 |

5C:

|    |          |           |           |
|----|----------|-----------|-----------|
| Mn | 0.000000 | 0.000000  | 0.326830  |
| S  | 0.000000 | 0.000000  | -2.645683 |
| S  | 0.000000 | 0.993455  | 2.434126  |
| S  | 0.000000 | -0.993455 | 2.434126  |
| S  | 0.000000 | -1.622006 | -1.366621 |
| S  | 0.000000 | 1.622006  | -1.366621 |

5D:

|    |           |           |           |
|----|-----------|-----------|-----------|
| Mn | 0.524088  | -1.373692 | 0.000000  |
| S  | 0.854004  | 1.452293  | 0.000000  |
| S  | -0.418223 | 0.848201  | 2.046298  |
| S  | -0.418223 | -0.848201 | -2.046298 |
| S  | -0.418223 | 1.195251  | 1.683630  |
| S  | -0.418223 | 1.195251  | -1.683630 |

5E:

|    |           |           |           |
|----|-----------|-----------|-----------|
| Mn | -0.982766 | -1.304545 | -0.217762 |
| S  | -1.998963 | 0.435393  | 0.856091  |
| S  | -0.903882 | 1.265785  | -0.716941 |
| S  | 1.033544  | 1.823598  | -0.170672 |
| S  | 2.065580  | 0.161392  | 0.560873  |
| S  | 1.339292  | -1.647816 | -0.189098 |

5F:

|    |           |           |           |
|----|-----------|-----------|-----------|
| Mn | 0.865079  | -1.399197 | 0.020887  |
| S  | 2.243400  | 0.303265  | -0.600612 |
| S  | 0.901720  | 1.148092  | 0.820521  |
| S  | -0.755827 | 1.912606  | -0.098547 |
| S  | -2.190276 | 0.320554  | -0.415914 |
| S  | -1.550704 | -1.498271 | 0.261915  |

$\text{MnS}_6^+$

6A:

|    |           |           |           |
|----|-----------|-----------|-----------|
| S  | 0.000000  | 0.998236  | 2.389506  |
| S  | 1.441228  | -0.984899 | -1.313400 |
| S  | 1.441228  | 0.984899  | -1.313400 |
| S  | -1.441228 | 0.984899  | -1.313400 |
| S  | -1.441228 | -0.984899 | -1.313400 |
| Mn | 0.000000  | 0.000000  | 0.303738  |
| S  | 0.000000  | -0.998236 | 2.389506  |

6B:

|    |           |           |           |
|----|-----------|-----------|-----------|
| Mn | -0.370581 | -1.396190 | 0.110494  |
| S  | 1.902969  | -1.485624 | -0.418725 |
| S  | -1.695462 | 0.365443  | -0.975661 |
| S  | -2.427957 | -0.590889 | 0.718049  |
| S  | 0.847180  | 1.352162  | 0.986833  |
| S  | -0.510490 | 2.084746  | -0.438523 |
| S  | 2.462793  | 0.455708  | -0.044620 |

6C:

|    |           |           |           |
|----|-----------|-----------|-----------|
| S  | 0.000000  | 2.123663  | 0.989968  |
| S  | -1.839146 | -1.061831 | -0.989968 |
| S  | -1.839146 | -1.061831 | 0.989968  |
| S  | 1.839146  | -1.061831 | 0.989968  |
| S  | 1.839146  | -1.061831 | -0.989968 |
| Mn | 0.000000  | 0.000000  | 0.000000  |
| S  | 0.000000  | 2.123663  | -0.989968 |

6D:

|    |           |           |           |
|----|-----------|-----------|-----------|
| S  | -1.530254 | 1.012309  | 0.983743  |
| S  | -2.623071 | -0.848333 | 0.224904  |
| S  | -0.716846 | 1.928447  | -0.647578 |
| Mn | 0.563910  | 0.168311  | 0.014428  |
| S  | -1.221182 | -1.684952 | -0.893103 |
| S  | 2.794275  | 0.317518  | -0.581466 |
| S  | 2.415968  | -0.987974 | 0.890957  |

| 6E: |           |           |           | 6F: |           |           |           |
|-----|-----------|-----------|-----------|-----|-----------|-----------|-----------|
| S   | 0.751914  | 2.826168  | 1.007982  | Mn  | -0.440981 | -1.057112 | -0.447727 |
| S   | 0.751914  | 2.826168  | -1.007982 | S   | -2.487036 | -0.529388 | 0.388581  |
| Mn  | -0.280928 | 1.001823  | 0.000000  | S   | 1.256678  | -1.753426 | 0.892923  |
| S   | 0.751914  | -2.810826 | -0.951211 | S   | -1.607258 | 1.001915  | -0.651592 |
| S   | -1.284353 | -0.798016 | -1.015244 | S   | 1.872849  | -0.563974 | -0.658333 |
| S   | -1.284353 | -0.798016 | 1.015244  | S   | -0.020240 | 1.787422  | 0.883685  |
| S   | 0.751914  | -2.810826 | 0.951211  | S   | 1.674041  | 1.709188  | -0.155690 |

### MnS<sub>7</sub><sup>+</sup>

| 7A: |           |           |           | 7B: |           |           |           |
|-----|-----------|-----------|-----------|-----|-----------|-----------|-----------|
| S   | -0.615406 | 0.291959  | 2.070586  | S   | 2.911029  | -0.486001 | 0.493263  |
| S   | -0.615406 | -1.779149 | 1.997745  | S   | 0.136659  | -1.935287 | -0.912812 |
| S   | 1.206830  | 2.216502  | 0.000000  | S   | -3.144217 | -0.342870 | -0.461173 |
| S   | -0.615406 | -1.779149 | -1.997745 | S   | -2.706373 | 0.967274  | 0.979071  |
| S   | 1.429972  | 1.030630  | -1.696088 | S   | 0.558095  | 1.870646  | -0.457444 |
| S   | -0.615406 | 0.291959  | -2.070586 | S   | 2.505365  | 1.462313  | -0.368296 |
| Mn  | -1.027295 | -0.834164 | 0.000000  | S   | 1.092837  | -1.439068 | 0.866052  |
| S   | 1.429972  | 1.030630  | 1.696088  | Mn  | -0.866172 | -0.062085 | -0.088743 |

| 7C: |           |           |           | 7D: |           |           |           |
|-----|-----------|-----------|-----------|-----|-----------|-----------|-----------|
| Mn  | 0.219280  | 0.713284  | 0.000000  | S   | -1.057683 | -0.647288 | 2.010943  |
| S   | -1.804065 | 0.187808  | 1.005852  | S   | -1.057683 | -0.647288 | -2.010943 |
| S   | -1.804065 | 0.187808  | -1.005852 | S   | 0.884702  | -1.319759 | -2.075250 |
| S   | 3.119507  | 1.526300  | 0.000000  | S   | 0.066200  | 1.798250  | 0.000000  |
| S   | 1.877063  | 1.158880  | 1.598440  | S   | -1.057683 | 1.450389  | 1.758945  |
| S   | 1.877063  | 1.158880  | -1.598440 | S   | 0.884702  | -1.319759 | 2.075250  |
| S   | -1.804065 | -2.667091 | 0.951297  | S   | -1.057683 | 1.450389  | -1.758945 |
| S   | -1.804065 | -2.667091 | -0.951297 | Mn  | 1.532883  | -0.489558 | 0.000000  |

| 7E: |           |           |           | 7F: |           |           |           |
|-----|-----------|-----------|-----------|-----|-----------|-----------|-----------|
| S   | -0.137564 | 3.490087  | 0.252816  | S   | 2.910316  | 0.497244  | 0.520432  |
| S   | -1.308253 | -1.213205 | -1.250138 | S   | -3.174449 | -0.364572 | -0.421097 |
| S   | 1.111976  | 2.546266  | -1.055087 | S   | 1.075031  | -1.428081 | 0.874555  |
| S   | -1.175619 | -2.909571 | -0.228733 | S   | 0.134490  | -1.949406 | -0.907644 |
| S   | 1.771221  | -1.380385 | 0.462687  | S   | 2.534188  | 1.417271  | -0.415854 |
| S   | 0.734360  | -3.041008 | 0.741848  | S   | 0.606097  | 1.914677  | -0.414438 |
| S   | -1.129267 | 2.028530  | 1.263446  | Mn  | -0.887149 | -0.076092 | -0.106608 |
| Mn  | 0.133145  | 0.479287  | -0.186839 | S   | -2.699503 | 1.026248  | 0.930620  |

## MnS<sub>8</sub><sup>+</sup>

### 8A:

|    |           |           |           |
|----|-----------|-----------|-----------|
| S  | 0.000000  | 1.811874  | 1.641422  |
| S  | 0.000000  | -1.057592 | 3.490578  |
| S  | -1.811874 | 0.000000  | -1.641422 |
| Mn | 0.000000  | 0.000000  | 0.000000  |
| S  | 0.000000  | 1.057592  | 3.490578  |
| S  | 1.811874  | 0.000000  | -1.641422 |
| S  | 0.000000  | -1.811874 | 1.641422  |
| S  | 1.057592  | 0.000000  | -3.490578 |
| S  | -1.057592 | 0.000000  | -3.490578 |

### 8B:

|    |           |           |           |
|----|-----------|-----------|-----------|
| S  | 1.649280  | -2.194795 | 0.307746  |
| S  | 0.883834  | 1.438174  | 1.225368  |
| S  | 2.160385  | -0.683752 | -0.976888 |
| Mn | -0.146392 | -0.938647 | -0.264702 |
| S  | -1.531610 | 0.946423  | -1.097725 |
| S  | -0.522006 | 2.487422  | 0.041323  |
| S  | -1.979384 | -1.666578 | 0.811521  |
| S  | 2.631115  | 1.150561  | 0.126292  |
| S  | -3.062876 | -0.010818 | -0.024040 |

### 8C:

|    |           |           |           |
|----|-----------|-----------|-----------|
| Mn | -0.749190 | 0.014138  | 0.106265  |
| S  | 0.708934  | -1.931887 | -0.061007 |
| S  | -2.391488 | -0.460956 | -1.511611 |
| S  | -3.038924 | -0.255046 | 0.356857  |
| S  | -0.473017 | 2.194976  | 0.798394  |
| S  | 2.630638  | 0.791580  | 0.129257  |
| S  | 0.744843  | 1.738652  | -0.753354 |
| S  | 2.653881  | -0.916928 | -0.887806 |
| S  | 0.335743  | -1.182481 | 1.763231  |

### 8D:

|    |           |           |           |
|----|-----------|-----------|-----------|
| S  | -1.863891 | -1.325590 | 1.152824  |
| S  | -3.266593 | 0.932098  | -0.958583 |
| S  | 1.863035  | 1.325421  | 1.152786  |
| Mn | -0.000195 | -0.000551 | 0.337821  |
| S  | -3.445878 | -0.978379 | -0.027946 |
| S  | 1.550246  | -1.805448 | -0.430854 |
| S  | -1.549387 | 1.805340  | -0.430397 |
| S  | 3.267277  | -0.931566 | -0.958246 |
| S  | 3.445495  | 0.978985  | -0.027429 |

### 8E:

|    |           |           |           |
|----|-----------|-----------|-----------|
| S  | -3.111836 | 0.628483  | 0.750762  |
| S  | -3.061936 | -0.051348 | -1.135048 |
| S  | 1.918731  | 2.097890  | 0.369468  |
| S  | 0.130841  | 1.927056  | -0.447128 |
| Mn | -1.053886 | -0.211099 | 0.074985  |
| S  | 2.239484  | -0.915095 | -1.243383 |
| S  | 0.347116  | -2.064988 | -0.301505 |
| S  | 0.228262  | -1.378140 | 1.599421  |
| S  | 2.956035  | 0.085985  | 0.290247  |

### 8F:

|    |           |           |           |
|----|-----------|-----------|-----------|
| S  | 1.682313  | -1.627652 | 1.343554  |
| S  | -2.024782 | -1.513913 | -1.134097 |
| Mn | 0.142518  | -1.148041 | -0.290011 |
| S  | -3.103773 | -0.237785 | 0.062328  |
| S  | 2.680056  | -0.756115 | -0.262756 |
| S  | 0.554434  | 1.577761  | -1.040244 |
| S  | -0.863457 | 2.326421  | 0.345976  |
| S  | -1.654559 | 0.655069  | 1.339106  |
| S  | 2.507084  | 1.370027  | -0.200725 |
